# Supplementary material for: Mutation Spectrum in TPO Gene of Bangladeshi Patients with Thyroid Dyshormonogenesis and Analysis of the Effects of Different Mutations on the Structural Features and Functions of TPO Protein through In Silico Approach
Source: Hindawi journal article supplement (doi:10.1155/2019/9218903), 2019-02-24
Supplement: f1 [file 9218903.f1.pdf]

### Supplementary information

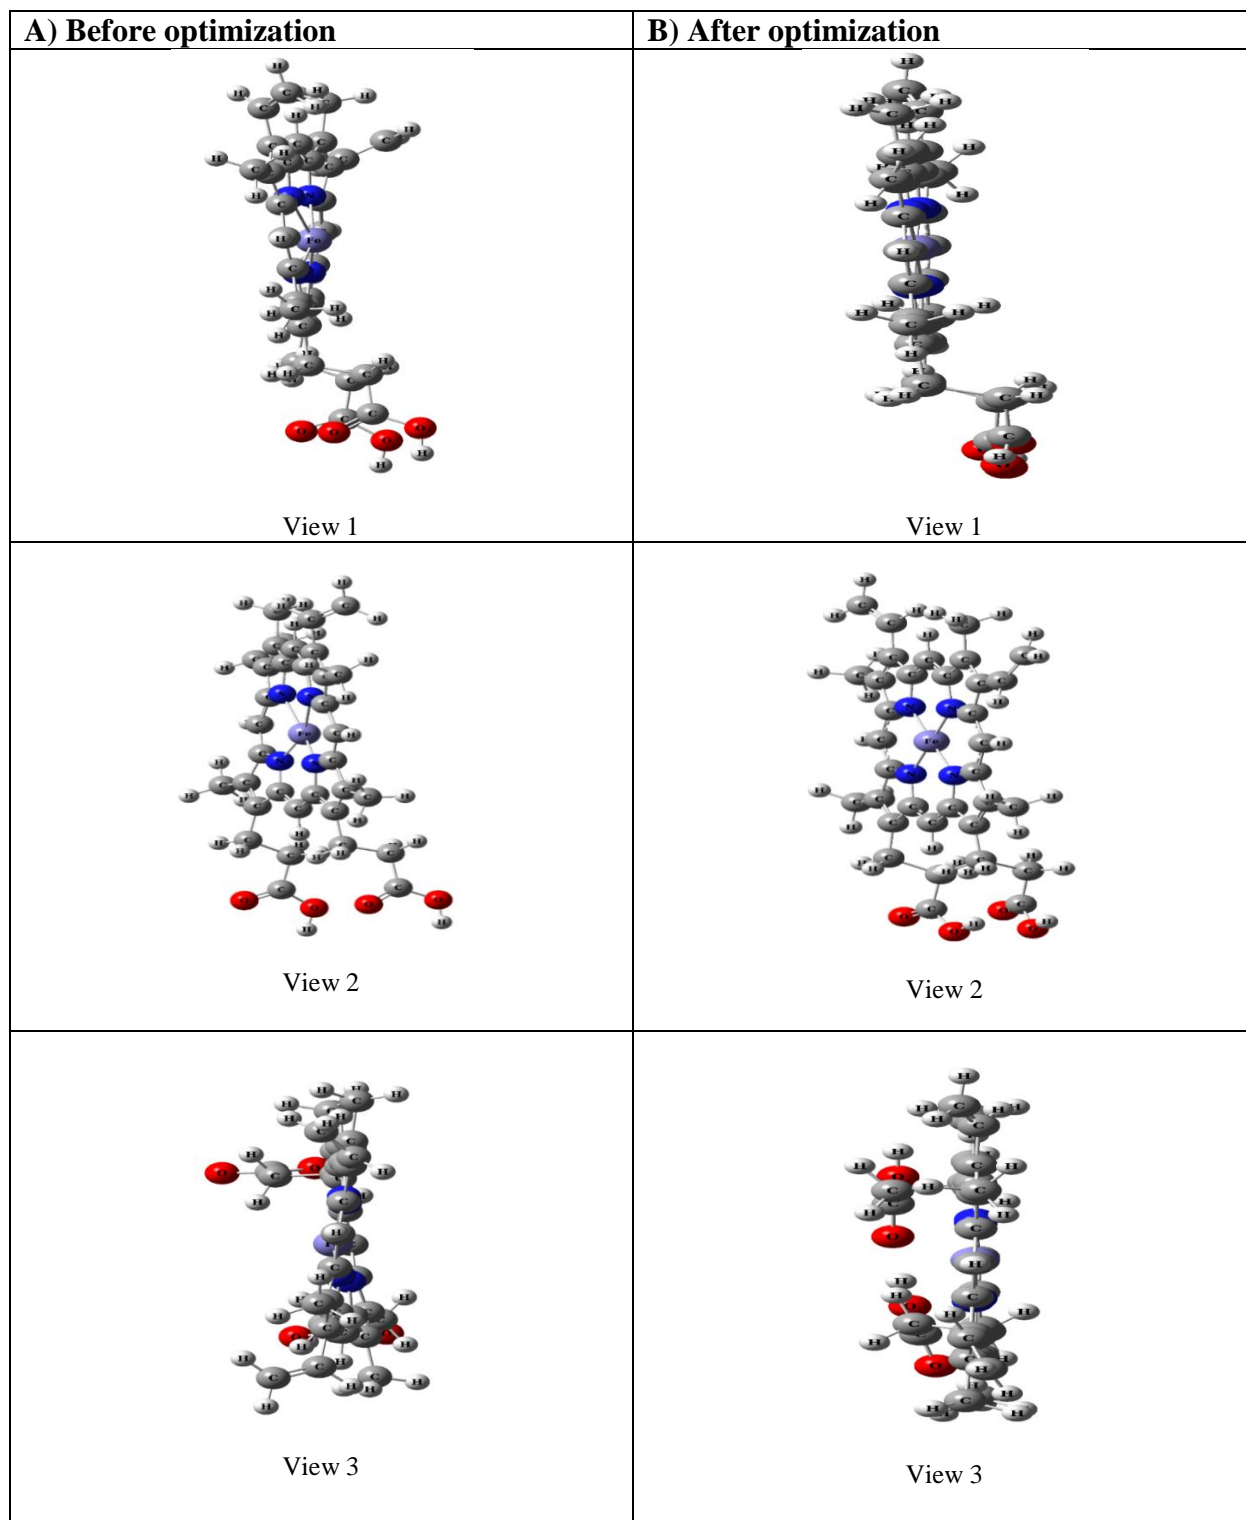

Supplementary Figure 1: Structural differences of heme before and after optimization from three different points of view.

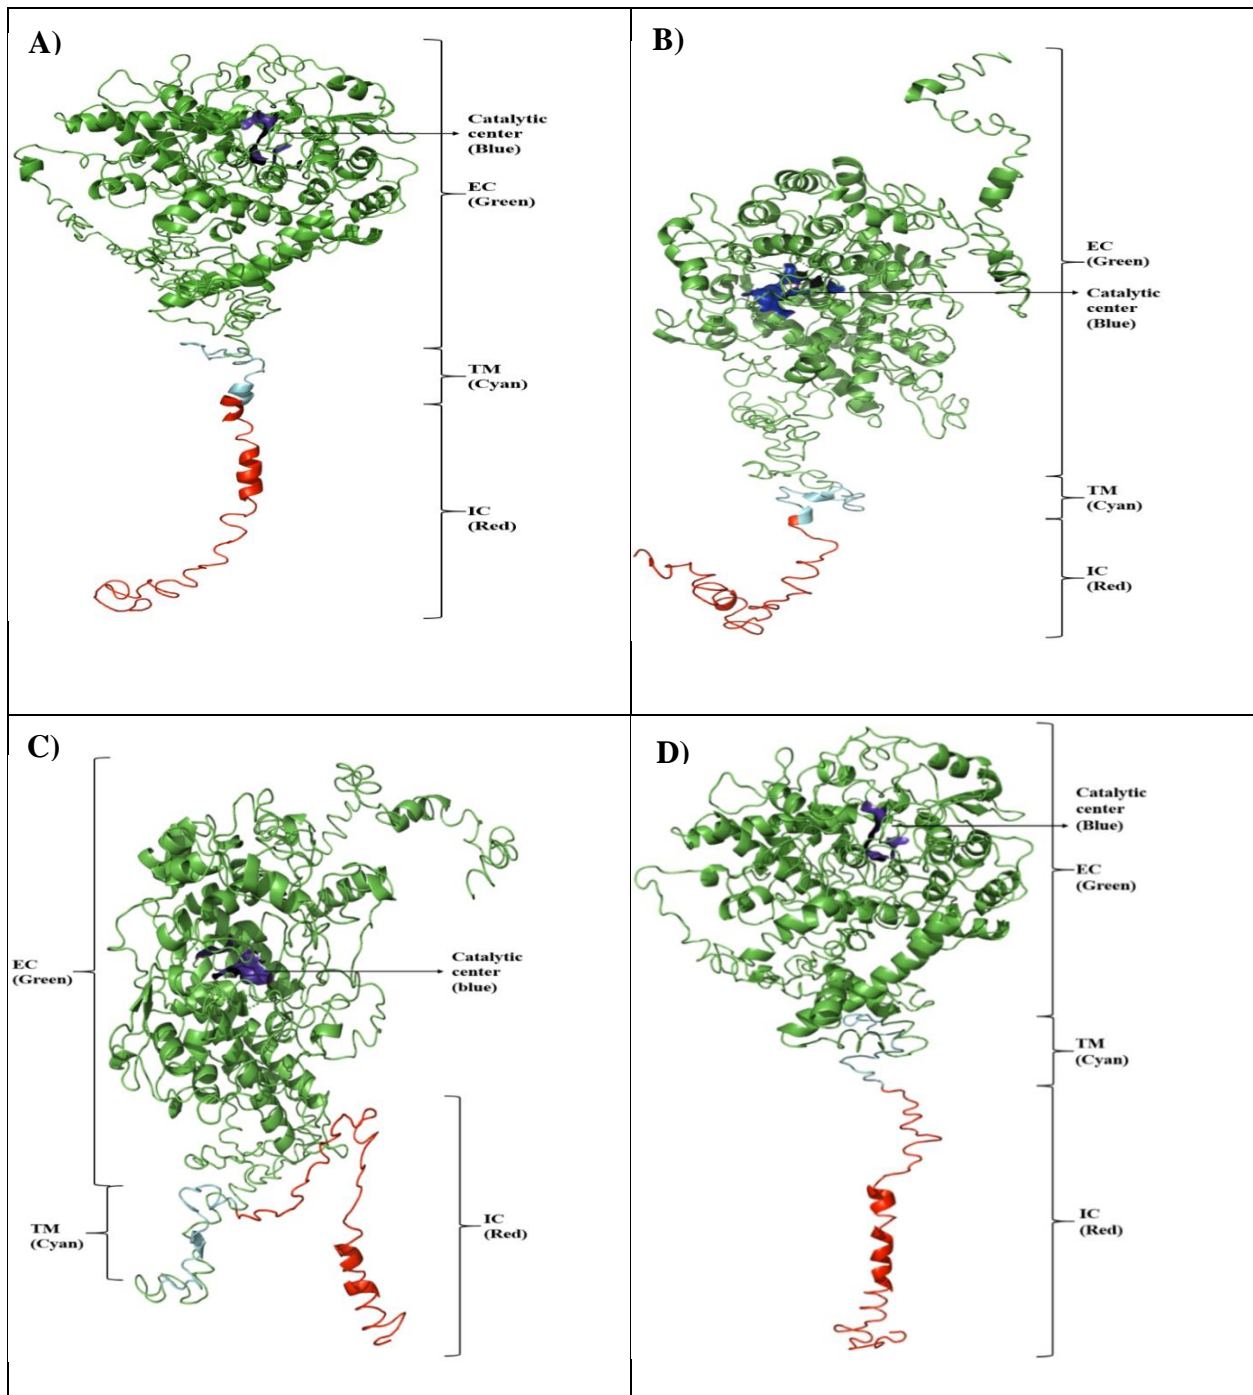

Supplementary Figure 2: The predicted 3D structures of the proteins. (A) TPO<sub>1-933</sub> WT, (B) TPO<sub>1-933</sub> MT1, (C) TPO<sub>1-933</sub> MT2, (D) TPO<sub>1-933</sub> MT3. The specific regions of the structures are indicated with the corresponding color written in the brackets. EC=Extracellular region shown in green

color, TM=Transmembrane region shown in cyan color, IC=Intracellular region shown in red color, Catalytic center shown in blue color.

**Supplementary Table 1. Binding energies and non-bond interactions of Heme with TPO<sub>142-738</sub> WT, TPO<sub>142-738</sub> MT1, TPO<sub>142-738</sub> MT2, TPO<sub>142-738</sub> MT3 after flexible docking.**

| Protein                    | Binding energy (kcal / mol) | Category                   | Interacting amino acids  | Interaction types          | Distance (Å)         | Total no. of interactions |
|----------------------------|-----------------------------|----------------------------|--------------------------|----------------------------|----------------------|---------------------------|
| TPO <sub>142-738</sub> WT  | -11.9                       | Hydrogen bond              | Arg441(Arg582)           | Conventional Hydrogen bond | 2.668                | 21                        |
|                            |                             |                            |                          |                            | 2.897                |                           |
|                            |                             |                            |                          |                            | 2.489                |                           |
|                            |                             |                            | Hydrophobic interactions | Arg445(Arg586)             | Carbon Hydrogen bond |                           |
|                            |                             | His98(His239)              |                          |                            |                      |                           |
|                            |                             |                            |                          | Val259(Val400)             | Alkyl                |                           |
|                            |                             | His353(His 494)            |                          |                            |                      |                           |
|                            |                             |                            |                          | Ile356(Ile497)             | Alkyl                |                           |
|                            |                             | Phe382(Phe523)             |                          |                            |                      |                           |
|                            |                             |                            |                          | Leu419(Leu560)             | Alkyl                |                           |
|                            |                             | Leu423(Leu564)             |                          |                            |                      |                           |
|                            |                             |                            |                          | Val425(Val566)             | Alkyl                |                           |
|                            |                             | Leu426(Leu567)             |                          |                            |                      |                           |
|                            |                             |                            |                          | Leu434(Leu575)             | Pi-Alkyl             |                           |
|                            |                             | Arg255(Arg396)             |                          |                            |                      |                           |
|                            |                             |                            | Glu258(Glu399)           | Pi-Cation                  | 4.845                |                           |
| Electrostatic interactions | Pi-Anion                    | 5.458                      |                          |                            |                      |                           |
|                            |                             | Arg255(Arg396)             | Pi-Cation                | 5.089                      |                      |                           |
| Glu258(Glu399)             | Pi-Anion                    |                            |                          | 4.461                      |                      |                           |
|                            |                             | Electrostatic interactions | Pi-Anion                 | 4.296                      |                      |                           |
| Glu258(Glu399)             | Pi-Anion                    |                            |                          | 3.602                      |                      |                           |
|                            |                             | Hydrogen bond              | Met90(Met231)            | Conventional Hydrogen bond | 2.327                | 19                        |
| Gly93(Gly234)              | Carbon Hydrogen bond        |                            |                          |                            | 2.938                |                           |
|                            |                             |                            |                          |                            | Ser261(Ser402)       |                           |
| Ser261(Ser402)             | Conventional Hydrogen bond  | 2.109                      |                          |                            |                      |                           |

|                            |                |                            |                |                            |       |    |
|----------------------------|----------------|----------------------------|----------------|----------------------------|-------|----|
|                            |                |                            | Gly352(Gly493) | Carbon Hydrogen bond       | 2.792 |    |
|                            |                | Hydrophobic interactions   | Gly93(Gly234)  | Amide Pi Stacked           | 5.0   |    |
|                            |                |                            | Gln94(Gln235)  |                            |       |    |
|                            |                |                            | Val259(Val400) | Alkyl                      | 3.566 |    |
|                            |                |                            |                | Pi-Alkyl                   | 5.471 |    |
|                            |                |                            | Phe349(Phe490) | Pi-Alkyl                   | 4.054 |    |
|                            |                |                            | Arg350(Arg491) | Alkyl                      | 4.666 |    |
|                            |                |                            |                | Pi-Alkyl                   | 5.031 |    |
|                            |                |                            | Ile356(Ile497) | Pi-Alkyl                   | 5.193 |    |
|                            |                |                            | Phe382(Phe523) | Pi-Alkyl                   | 3.95  |    |
|                            |                |                            |                |                            | 4.787 |    |
|                            |                | Leu419(Leu560)             | Alkyl          | 5.252                      |       |    |
|                            |                | Leu423(Leu564)             | Alkyl          | 4.464                      |       |    |
|                            |                | Leu434(Leu575)             | Pi-Alkyl       | 4.935                      |       |    |
|                            |                | Electrostatic interactions | Glu258(Glu399) | Pi-Anion                   | 3.914 |    |
|                            |                |                            |                |                            | 4.651 |    |
| TPO <sub>142-738</sub> MT2 | -2.5           | Hydrogen bond              | Arg350(Arg491) | Conventional Hydrogen bond | 2.598 | 20 |
|                            |                |                            | Asn438(Asn579) |                            | 2.96  |    |
|                            |                |                            | Arg441(Arg582) |                            | 2.038 |    |
|                            |                | Hydrophobic interactions   | Phe102(Phe243) | Pi-Alkyl                   | 5.333 |    |
|                            |                |                            |                |                            | 4.615 |    |
|                            |                |                            | His353(His494) | Pi-Alkyl                   | 4.462 |    |
|                            |                |                            | Phe382(Phe523) | Pi-Alkyl                   | 3.678 |    |
|                            |                |                            | Phe383(Phe524) | Pi-Alkyl                   | 4.897 |    |
|                            |                |                            |                |                            | 4.558 |    |
|                            |                |                            | Leu423(Leu564) | Alkyl                      | 5.269 |    |
|                            |                |                            |                | Pi-Alkyl                   | 5.159 |    |
|                            |                |                            | Phe424(Phe565) | Pi-Alkyl                   | 5.105 |    |
|                            |                |                            | Val425(Val566) | Alkyl                      | 4.147 |    |
|                            |                | Leu426(Leu567)             | Alkyl          | 3.903                      |       |    |
|                            |                |                            | Pi-Alkyl       | 3.824                      |       |    |
| Leu434(Leu575)             | Alkyl          | 5.226                      |                |                            |       |    |
|                            |                | 5.139                      |                |                            |       |    |
|                            | 5.238          |                            |                |                            |       |    |
| Electrostatic interactions | Glu258(Glu399) | Pi-Anion                   | 3.338          |                            |       |    |
|                            |                |                            |                |                            |       |    |
| TPO <sub>142-738</sub> MT3 | -5.3           | Hydrogen bond              | His98(His239)  | Conventional Hydrogen bond | 1.967 | 16 |
|                            |                |                            | Arg255(Arg396) |                            | 2.793 |    |
|                            |                |                            | Arg350(Arg491) |                            | 2.686 |    |
|                            |                |                            | Arg441(Arg582) |                            | 2.36  |    |

|                            |                |                          |                |          |       |  |
|----------------------------|----------------|--------------------------|----------------|----------|-------|--|
|                            |                | Hydrophobic interactions | Phe102(Phe243) | Pi-Alkyl | 4.516 |  |
|                            |                |                          | Phe382(Phe523) | Pi-Alkyl | 3.675 |  |
|                            |                |                          | Phe383(Phe524) | Pi-Alkyl | 3.622 |  |
|                            |                |                          |                |          | 4.795 |  |
|                            |                |                          | Leu423(Leu564) | Alkyl    | 4.628 |  |
|                            |                |                          | Phe424(Phe565) | Pi-Alkyl | 4.705 |  |
|                            |                |                          |                |          | 5.304 |  |
|                            |                |                          | Leu426(Leu567) | Alkyl    | 4.406 |  |
|                            |                | 4.555                    |                |          |       |  |
|                            |                | Leu434(Leu575)           | Alkyl          | 4.991    |       |  |
| Pi-Alkyl                   | 5.148          |                          |                |          |       |  |
| Electrostatic interactions | Glu258(Glu399) | Pi-Anion                 | 3.633          |          |       |  |

The amino acid residues and their positions are designated as the three letter abbreviations and the corresponding number; in case of TPO<sub>142-738</sub> the amino acid outside the first bracket indicates the position in predicted structure for TPO<sub>142-738</sub> and the amino acid residues in first bracket indicates the real position in TPO<sub>1-933</sub> protein; WT = Wild type; MT1 = Mutant 1 (p.Ala373Ser); MT2 = Mutant 2 (p.Ser398Thr); MT3 = Mutant 3 (p.Thr725Pro).

**Supplementary Table 2: Binding energies and nonbond interactions of Heme with TPO<sub>1-933</sub> WT, TPO<sub>1-933</sub> MT1, TPO<sub>1-933</sub> MT2 and TPO<sub>1-933</sub> MT3 after flexible docking.**

| Protein                 | Binding energy (kcal / mol) | Category                 | Interacting amino acids | Interaction types          | Distance (Å) | Total no. of interactions |
|-------------------------|-----------------------------|--------------------------|-------------------------|----------------------------|--------------|---------------------------|
| TPO <sub>1-933</sub> WT | -11.5                       | Hydrogen bond            | Arg491                  | Conventional Hydrogen bond | 2.579        | 21                        |
|                         |                             |                          | Arg582                  |                            | 2.765        |                           |
|                         |                             |                          |                         |                            | 2.445        |                           |
|                         |                             | Hydrophobic interactions | His239                  | Pi-Pi T-Shaped             | 5.589        |                           |
|                         |                             |                          | Val400                  | Alkyl                      | 4.169        |                           |
|                         |                             |                          |                         |                            | 4.851        |                           |
|                         |                             |                          | Phe490                  | Pi-Alkyl                   | 4.875        |                           |
|                         |                             |                          | Arg491                  | Alkyl                      | 4.094        |                           |
|                         |                             |                          | His494                  | Pi-Pi T-Shaped             | 4.139        |                           |
|                         |                             |                          |                         | Pi-Alkyl                   | 5.076        |                           |
|                         |                             |                          | Ile497                  | Alkyl                      | 5.259        |                           |
|                         |                             |                          | Phe523                  | Pi-Alkyl                   | 4.176        |                           |
|                         |                             |                          | Leu560                  | Pi-Alkyl                   | 5.115        |                           |
|                         |                             |                          |                         | Alkyl                      | 4.254        |                           |
| Leu564                  | Alkyl                       | 4.066                    |                         |                            |              |                           |
|                         |                             | 4.406                    |                         |                            |              |                           |

|                          |          |                            |                      |                            |       |    |
|--------------------------|----------|----------------------------|----------------------|----------------------------|-------|----|
|                          |          |                            | Leu575               | Pi-Alkyl                   | 5.391 |    |
|                          |          | Electrostatic interactions | Arg396               | Pi-Cation                  | 4.894 |    |
|                          |          |                            | Glu399               | Pi-Anion                   | 3.536 |    |
|                          |          |                            |                      |                            | 3.585 |    |
|                          |          |                            | Arg491               | Pi-Cation                  | 4.526 |    |
| TPO <sub>1-933</sub> MT1 | -3.2     | Hydrogen Bond              | His239               | Conventional Hydrogen bond | 2.209 | 12 |
|                          |          |                            | His494               | Carbon Hydrogen bond       | 2.809 |    |
|                          |          | Hydrophobic interactions   | His239               | Pi-Alkyl                   | 4.919 |    |
|                          |          |                            | Phe243               | Pi-Pi T-Shaped             | 4.875 |    |
|                          |          |                            | Arg396               | Alkyl                      | 3.979 |    |
|                          |          |                            |                      | Pi-Alkyl                   | 3.680 |    |
|                          |          |                            | Phe524               | Pi-Alkyl                   | 4.706 |    |
|                          |          |                            |                      | Pi-Alkyl                   | 3.864 |    |
|                          |          |                            | Leu567               | Pi-Alkyl                   | 4.435 |    |
|                          |          |                            |                      | Alkyl                      | 5.123 |    |
|                          |          |                            |                      | Pi-Alkyl                   | 4.565 |    |
|                          |          |                            |                      | Pi-Alkyl                   | 5.397 |    |
| TPO <sub>1-933</sub> MT2 | -11.5    | Hydrogen Bond              | His239               | Conventional Hydrogen bond | 3.155 | 20 |
|                          |          |                            | Arg491               |                            | 2.743 |    |
|                          |          |                            | Arg582               |                            | 2.999 |    |
|                          |          |                            |                      |                            | 1.899 |    |
|                          |          | Hydrophobic interactions   | His239               | Pi-Pi T-Shaped             | 5.261 |    |
|                          |          |                            | Val400               | Alkyl                      | 3.558 |    |
|                          |          |                            | Arg491               | Alkyl                      | 4.362 |    |
|                          |          |                            | His494               | Pi-Alkyl                   | 4.944 |    |
|                          |          |                            |                      | Pi-Alkyl                   | 5.043 |    |
|                          |          |                            | Ile497               | Alkyl                      | 5.116 |    |
|                          |          |                            | Phe523               | Pi-Alkyl                   | 4.003 |    |
|                          |          |                            |                      | Pi-Alkyl                   | 5.001 |    |
|                          |          |                            | Leu564               | Alkyl                      | 3.729 |    |
|                          |          |                            |                      | Pi-Alkyl                   | 5.453 |    |
|                          |          |                            | Val566               | Alkyl                      | 5.391 |    |
|                          |          |                            | Leu575               | Alkyl                      | 4.717 |    |
|                          |          | Electrostatic interactions | Arg396               | Pi-Alkyl                   | 4.676 |    |
|                          |          |                            | Arg396               | Pi-Cation                  | 4.176 |    |
|                          |          |                            |                      | Pi-Cation                  | 4.176 |    |
|                          |          |                            |                      | Pi-Cation                  | 4.176 |    |
| Glu399                   | Pi-Anion | 3.596                      |                      |                            |       |    |
|                          | Pi-Anion | 3.596                      |                      |                            |       |    |
|                          | Pi-Anion | 3.979                      |                      |                            |       |    |
| TPO <sub>1-933</sub> MT3 | -7.9     | Hydrogen Bond              | Gln246               | Conventional hydrogen bond | 2.295 | 21 |
|                          |          |                            |                      |                            | 2.351 |    |
|                          |          |                            | Arg491               |                            | 3.085 |    |
|                          |          | Ser568                     | Carbon hydrogen bond | 1.969                      |       |    |
|                          |          |                            |                      | 3.043                      |       |    |
|                          |          | Hydrophobic interactions   | Phe243               | Pi-Pi T-Shaped             | 5.806 |    |
|                          |          |                            |                      | Pi-Alkyl                   | 5.488 |    |
| Val400                   | Alkyl    |                            | 5.463                |                            |       |    |

|  |  |                            |        |          |       |  |
|--|--|----------------------------|--------|----------|-------|--|
|  |  |                            | Arg491 | Alkyl    | 4.445 |  |
|  |  |                            | His494 | Pi-Alkyl | 4.209 |  |
|  |  |                            | Ile497 | Alkyl    | 4.875 |  |
|  |  |                            | Phe523 | Pi-Alkyl | 4.544 |  |
|  |  |                            | Phe524 | Pi-Alkyl | 5.488 |  |
|  |  |                            | Leu560 | Alkyl    | 4.702 |  |
|  |  |                            | Leu564 | Alkyl    | 4.943 |  |
|  |  |                            | Val566 | Alkyl    | 3.745 |  |
|  |  |                            | Leu575 | Pi-Alkyl | 4.767 |  |
|  |  | Electrostatic interactions | Glu399 | Pi-Anion | 4.081 |  |
|  |  |                            |        |          | 3.653 |  |

The amino acid residues and their positions are designated as the three letter abbreviations and the corresponding number. WT = Wild type; MT1 = Mutant 1 (p.Ala373Ser); MT2 = Mutant 2 (p.Ser398Thr); MT3 = Mutant 3 (p.Thr725Pro).

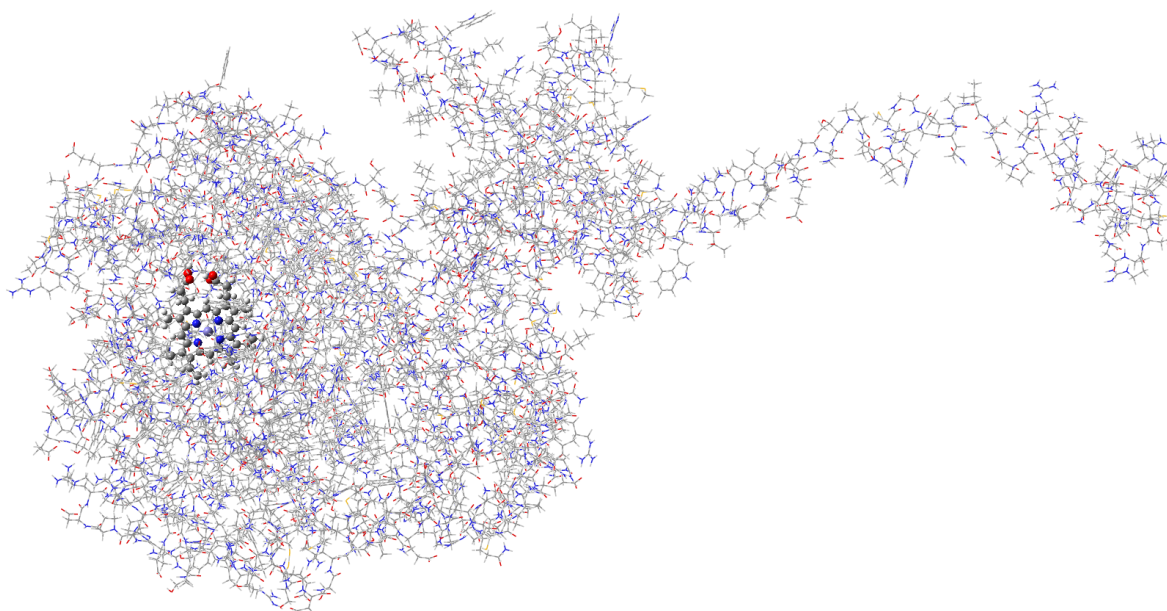

Supplementary Figure 3: QM/MM ONIOM calculation set up for protein-ligand complexes, high level (ball and stick) and low level (line).
